# Supplementary material for: Simple preparation of a durable and low-cost load-bearing three-dimensional porous material for emulsion separation
Source: Royal Society of Chemistry journal article supplement (doi:10.1039/d1nj03049c), 2021-01-01
Supplement: d1nj03049c1.pdf [file d1nj03049c1.pdf]

### Simple preparation of a durable and low-cost load-bearing three-dimensional porous material for emulsion separation

Mingzhi Fan<sup>a,c</sup> Zhiying Ren<sup>a\*</sup>, Zhen Zhang<sup>a,c</sup>, Yu Yang<sup>a,c</sup>, Zhiguang Guo<sup>b, c\*</sup>,

*a. College of Mechanical Engineering and Automation, Fuzhou University, Fuzhou 350116, People's Republic of China.*

*b. Ministry of Education Key Laboratory for the Green Preparation and Application of Functional Materials, Hubei University, Wuhan 430062, People's Republic of China.*

*c. State Key Laboratory of Solid Lubrication, Lanzhou Institute of Chemical Physics, Chinese Academy of Sciences, Lanzhou 730000, People's Republic of China.*

*\*E-mail: zguo@licp.cas.cn (Guo); renzyrose@126.com (Ren)*

SA=3.4°

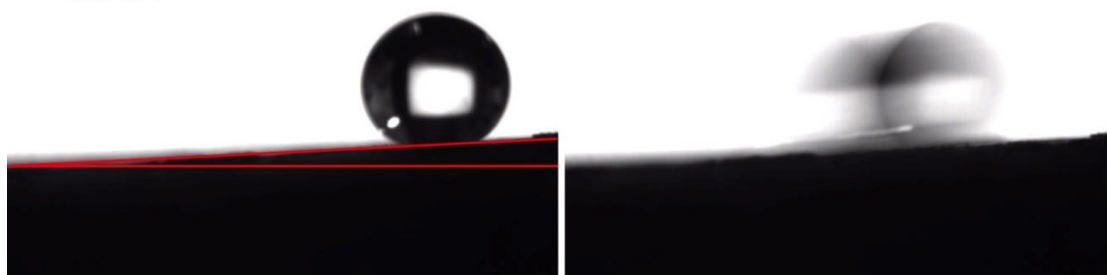

Fig.S1. Rolling angle of MR-C

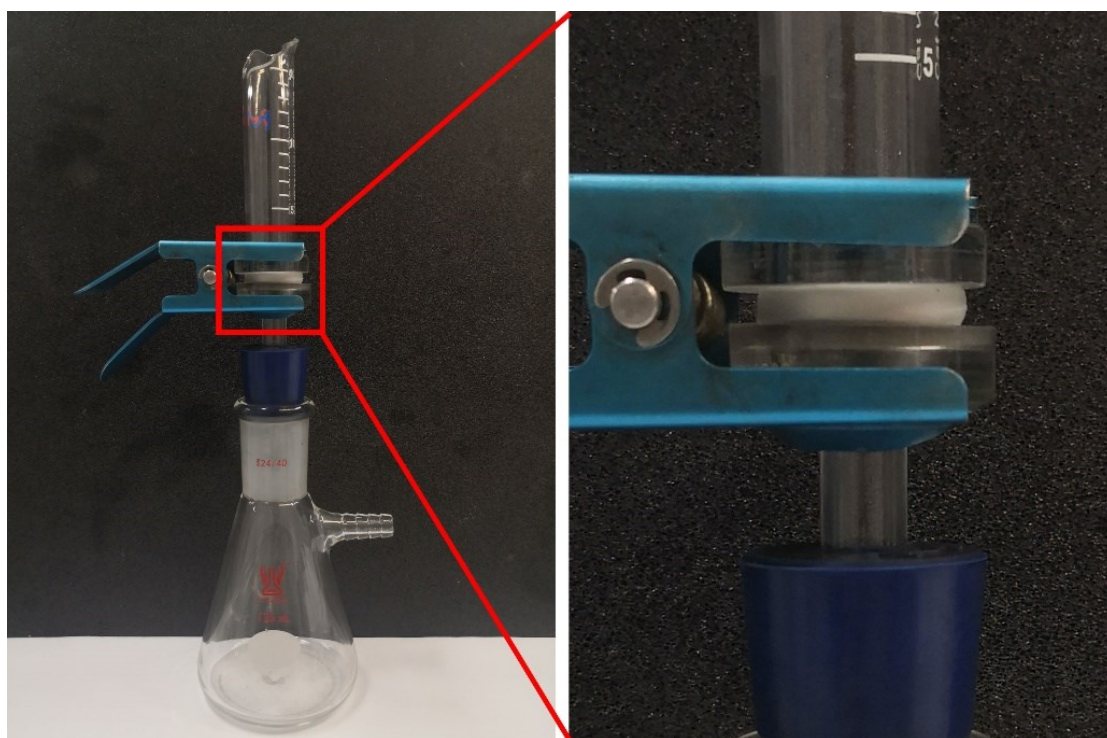

Fig.S2. Filter device and local magnification

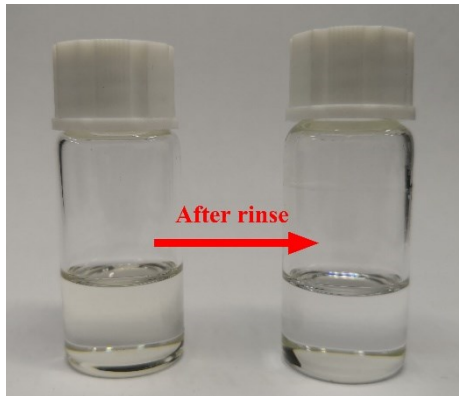

**Fig. S3.** Photograph before and after rinse

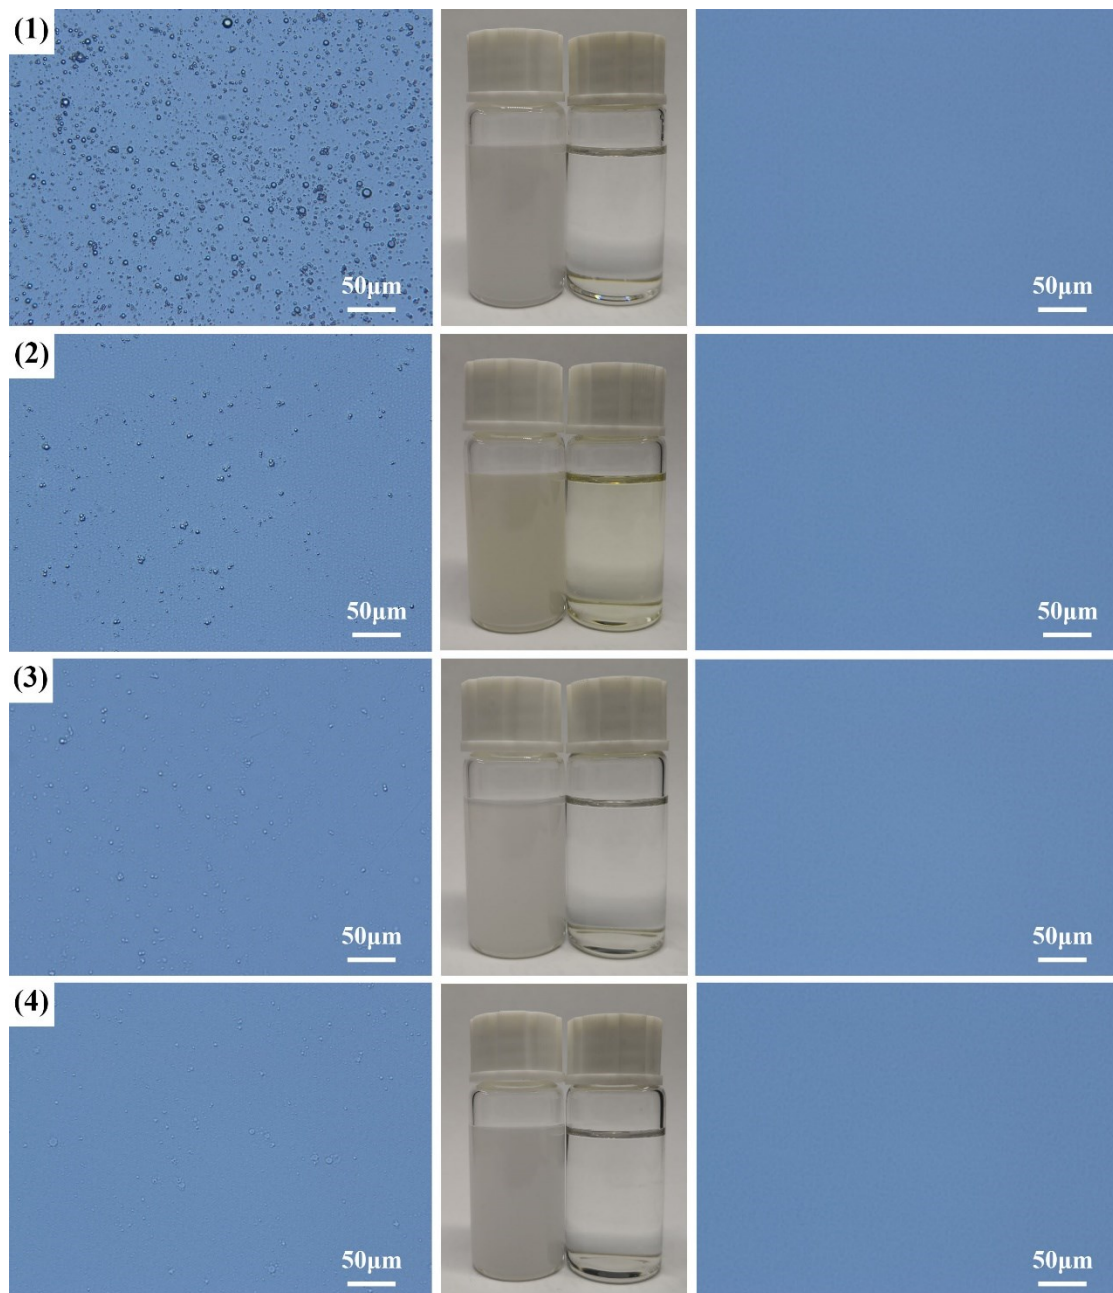

**Fig. S4.** Microscopic images of droplet distribution of water-in-oil emulsions [(1) xylene, (2) gasoline, (3) n-heptane and (4) n-hexane] before and after filtration

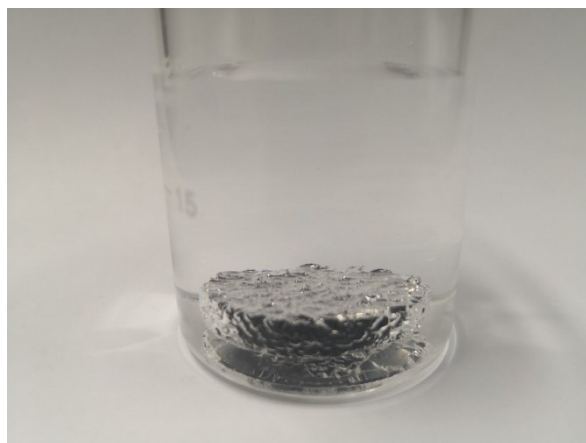

**Fig. S5.** Silver Mirror phenomenon of MR-C in 3.5wt%NaCl

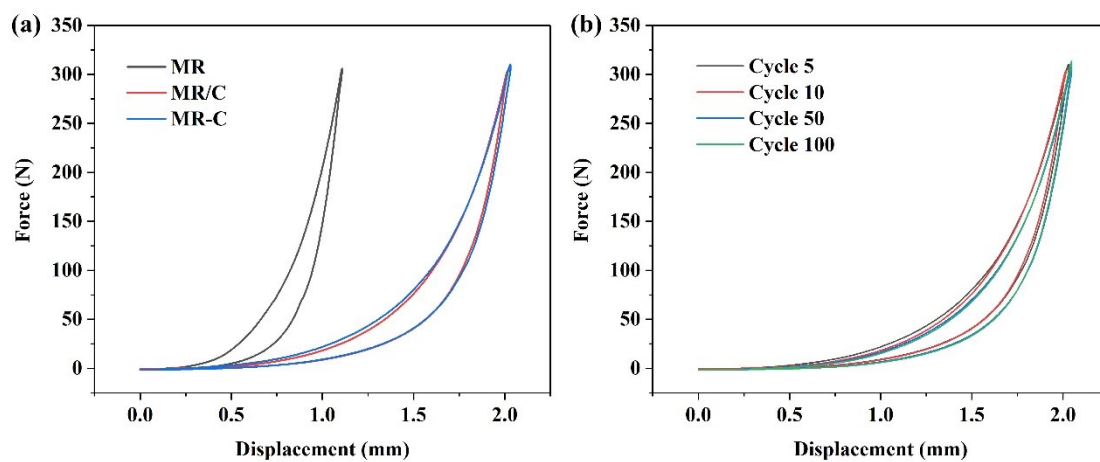

**Fig. S6.** Compression resilience of MR-C (a) hysteresis curves of different samples, (b) hysteresis curves of MR-C for different numbers of compression cycles. MR/C does not wrap PDMS.
